# Supplementary material
Source: ML conference proceedings conference paper supplement (https://openreview.net/forum?id=nz4ZqbrBEi)
Supplement: supplementary_material [file test_hello_multi.docx]

**Hello World 1**

**Hello World 2**

**Hello World 3**
